# Supplementary material
Source: Springer Nature journal article supplement (https://www.springermedizin.de/resource/supplementary/13047_2013_602_MOESM2_ESM.pdf/9664178)

A

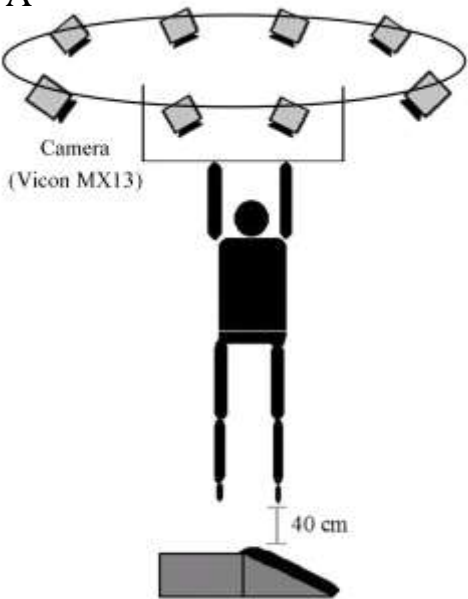

B

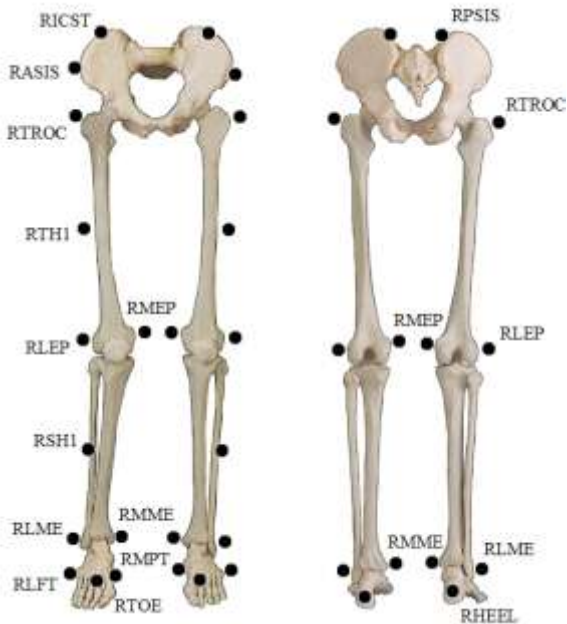

Supplement: MOESM2 [file 9664178]
